# Supplementary material
Source: ML conference proceedings conference paper supplement (https://proceedings.neurips.cc/paper_files/paper/2012/hash/f8c1f23d6a8d8d7904fc0ea8e066b3bb-Abstract.html)
Supplement: Supplementary file 1 [file f8c1f23d6a8d8d7904fc0ea8e066b3bb-Supplemental.zip]

---

# Synchronization can Control Regularization in Neural Systems via Correlated Noise Processes: Supplementary Material

---

**Jake Bouvrie**  
Department of Mathematics  
Duke University  
Durham, NC 27708  
jvb@math.duke.edu

**Jean-Jacques Slotine**  
Nonlinear Systems Laboratory  
Massachusetts Institute of Technology  
Cambridge, MA 02138  
jjs@mit.edu

## 1 Proof of Theorem 3.1

Recall the definitions  $\alpha := \|\mathbf{x}\|^2 + m\gamma^2$ ,  $\beta := \langle \mathbf{x}, \mathbf{y} \rangle$ , and  $\boldsymbol{\mu} := (\beta/\alpha)\mathbf{1}$ . Viewing  $\mathbf{w}(t)$  as a collection of Gaussian random variables indexed by  $t$ , expressions for  $\bar{w}(t)$  and  $\tilde{\mathbf{w}}(t)$  can be obtained as manipulations of Gaussians:

$$\begin{aligned}\bar{w}(t) &\sim \mathcal{N}\left(\frac{1}{n}\mathbf{1}^\top \boldsymbol{\mu}_w(t), \frac{1}{n^2}\mathbf{1}^\top \Sigma_w(t)\mathbf{1}\right) \\ &= \mathcal{N}\left(e^{-\alpha t} \mathbb{E}[\bar{w}(0)] + (1 - e^{-\alpha t})\frac{\beta}{\alpha}, e^{-2\alpha t} \mathbb{E}[(\bar{w}(0))^2] + \frac{\sigma^2}{2\alpha n}(1 - e^{-2\alpha t})\right)\end{aligned}$$

where  $\bar{w}(0) = \frac{1}{n}\mathbf{1}^\top \mathbf{w}(0)$ . Turning to the fluctuations, let  $Q = I - \frac{1}{n}\mathbf{1}\mathbf{1}^\top$  denote the orthogonal projection onto the zero-mean subspace of  $\mathbb{R}^n$ . Note that  $\tilde{\mathbf{w}} = Q\mathbf{w}$  and  $\bar{w}\mathbf{1} = (I - Q)\mathbf{w}$ . We have

$$\begin{aligned}\tilde{\mathbf{w}}(t) &\sim \mathcal{N}(Q\boldsymbol{\mu}_w(t), Q\Sigma_w(t)Q^\top) \\ &= \mathcal{N}\left(e^{-(L+\alpha I)t} \mathbb{E}[\tilde{\mathbf{w}}(0)], e^{-(L+\alpha I)t} \mathbb{E}[\tilde{\mathbf{w}}(0)\tilde{\mathbf{w}}(0)^\top]e^{-(L+\alpha I)t} \right. \\ &\quad \left. + \frac{\sigma^2}{2}(QLQ^\top + \alpha I)^{-1}(I - e^{-2(L+\alpha I)t})\right).\end{aligned}$$

We can now consider the error

$$\mathbb{E}\left[\frac{1}{n}\|\mathbf{w}(t) - \boldsymbol{\mu}\|^2\right] = \mathbb{E}\left[\frac{1}{n}\|\tilde{\mathbf{w}}(t)\|^2\right] + \mathbb{E}\left[\frac{1}{n}\|\bar{w}(t)\mathbf{1} - \boldsymbol{\mu}\|^2\right].$$

In general if  $\mathbf{x} \sim \mathcal{N}(\boldsymbol{\mu}_x, \Sigma_x)$  then  $\mathbb{E}[\|\mathbf{x} - \mathbf{c}\|^2] = \text{tr}(\Sigma_x) + \|\boldsymbol{\mu}_x - \mathbf{c}\|^2$  for any (non-random) vector  $\mathbf{c}$ . The first error term on the right-hand side can be estimated as

$$\begin{aligned}\mathbb{E}\left[\frac{1}{n}\|\tilde{\mathbf{w}}(t)\|^2\right] &\leq \frac{1}{n} \sum_{i>0} \lambda_i(\Sigma_w(0))e^{-2(\lambda_i(L)+\alpha)t} + \frac{\sigma^2}{2n} \sum_{i>0} \frac{1 - e^{-2(\lambda_i(L)+\alpha)t}}{\lambda_i(L) + \alpha} \\ &\quad + \mathbb{E}[\mathbf{w}(0)]^\top Q^\top e^{-2(L+\alpha)t} Q \mathbb{E}[\mathbf{w}(0)] \\ &\leq \lambda_{\max}(\Sigma_w(0))e^{-2(\underline{\lambda}+\alpha)t} + \frac{\sigma^2(1 - e^{-2(\underline{\lambda}+\alpha)t})}{2(\underline{\lambda} + \alpha)} + e^{-2(\underline{\lambda}+\alpha)t} \|\mathbb{E}[\mathbf{w}(0)]\|^2\end{aligned}$$

where  $\underline{\lambda}$  is the smallest non-zero eigenvalue of  $L$  and  $\lambda_{\max}(\cdot)$  denotes the largest eigenvalue of its argument. The first term on the right-hand side of the first inequality follows from Von Neumann's trace inequality. The second error term is given by

$$\begin{aligned}\mathbb{E}\left[\frac{1}{n}\|\bar{w}(t)\mathbf{1} - \boldsymbol{\mu}\|^2\right] &= \mathbb{E}\left[\left(\bar{w}(t) - \frac{\beta}{\alpha}\right)^2\right] \\ &= e^{-2\alpha t} \mathbb{E}[(\bar{w}(0))^2] + \frac{\sigma^2}{2\alpha n}(1 - e^{-2\alpha t}) + e^{-2\alpha t} \left(\mathbb{E}[\bar{w}(0)] - \frac{\beta}{\alpha}\right)^2.\end{aligned}$$

Note that  $\mathbb{E}[(\bar{w}(0))^2] = \frac{1}{n^2} \mathbf{1}^\top \Sigma_w(0) \mathbf{1}$  and  $\mathbb{E}[\bar{w}(0)] = \frac{1}{n^2} \mathbf{1}^\top \boldsymbol{\mu}_w(0)$ . Defining the constants

$$\tilde{C} := \lambda_{\max}(\Sigma_w(0)) - \frac{\sigma^2}{2(\lambda + \alpha)} + \|\mathbb{E}[\mathbf{w}(0)]\|^2$$

$$\bar{C} := \mathbb{E}[(\bar{w}(0))^2] - \frac{\sigma^2}{2\alpha n} + \left(\mathbb{E}[\bar{w}(0)] - \frac{\beta}{\alpha}\right)^2$$

and combining with the above, we obtain the Theorem.

## 2 Proof of Theorem 5.1

The OU process (16b) is ergodic and has stationary distribution  $\mu_\infty = \mathcal{N}(\mathbf{0}, \frac{1}{2}\sigma^2 I)$ . Furthermore, the system (17)-(16b) satisfies the conditions of Theorem 2.1. Homogenizing (17) requires the averaged vector field

$$F(u) = \int_{\mathbb{R}^d} (2u^\top Az + z^\top Az) z \mu_\infty(dz) = 2 \mathbb{E}[zz^\top] Au + \mathbb{E}[zz^\top Az] = \sigma^2 Au$$

(using that odd moments of a zero-mean Gaussian are zero), and leads to the averaged system

$$\dot{U} = -\gamma\sigma^2 AU, \quad U(0) = \mathbf{u}(0).$$

The solution to this ODE is easily found to be  $U(t) = e^{-\gamma\sigma^2 At} U(0)$ . Theorem 2.1 then provides that  $\mathbf{u}(t)$  converges in distribution to  $U(t)$  as  $\varepsilon \rightarrow 0$ . Since  $U(t)$  is deterministic for all  $t \geq 0$  in this case,  $\mathbf{u}(t)$  also converges to  $U(t)$  in probability. Let  $(e_i)_{i=1}^d$  denote the canonical basis of  $\mathbb{R}^d$  and let  $x^i$  denote the  $i$ -th coordinate of a vector  $x \in \mathbb{R}^d$ . The projection function  $\pi_i(x) = \langle x, e_i \rangle = x^i$  is clearly continuous, so by the continuous mapping theorem,  $\pi_i(\mathbf{u}_t) \rightarrow U^i(t)$  in probability.

Let  $\mathbf{u}_\varepsilon(t)$  denote the (strong) solution to (17) for some fixed  $\varepsilon \in (0, 1]$ . If the family  $\{\mathbf{u}_\varepsilon^i(t)\}_{\varepsilon \in (0, 1]}$  is uniformly integrable (for each  $t < \infty$ ), then together with  $\mathbf{u}^i(t) \rightarrow U^i(t)$  i.p., we would have that  $\mathbb{E}[\mathbf{u}_\varepsilon^i(t)] \rightarrow \mathbb{E}[U^i(t)] = U^i(t)$  as  $\varepsilon \rightarrow 0$  (by way of convergence in  $L_1$ ). We establish uniform integrability by showing that  $\sup_{\varepsilon \in (0, 1]} \mathbb{E}[\pi_i^2(\mathbf{u}_\varepsilon(t))] < \infty$ . First note that for any  $\varepsilon > 0$ , the OU process (16b) is a Gaussian process  $\mathbf{Z}_t \sim \mathcal{N}(\boldsymbol{\mu}_t, \Sigma_t)$  with bounded moments  $\mathbb{E}[\|\mathbf{Z}_t\|^p] < \infty, p \geq 1$ , for all  $t \leq T < \infty$ : Suppose  $X \sim \mathcal{N}(0, I_{d \times d})$ . Then for each  $t$ ,  $\mathbf{Z}_t = \boldsymbol{\mu}_t + \Sigma_t^{1/2} X$  in law. Because the standard Normal moments  $\mathbb{E}[\|X\|^p]$  are bounded for all  $p$ , we have, restricting our attention to  $p$  even, that

$$\begin{aligned} \mathbb{E}[\|\mathbf{Z}_t\|^p] &\leq 2^{p-1} (\|\boldsymbol{\mu}_t\|^p + \mathbb{E}[\|\Sigma_t^{1/2} X\|^p]) \\ &\leq C_p (e^{-pt/\varepsilon} + (\text{tr } \Sigma_t)^{p/2} \mathbb{E}[\|X\|^p]) \\ &\leq C_p (1 + e^{-pt/\varepsilon}) < \infty \end{aligned}$$

where  $C_p$  is a constant depending on  $p$  that changes from instance to instance, and where  $\boldsymbol{\mu}_t, \Sigma_t$  are given by (13a), (13b) (resp.) with  $L_z = 0, \eta = 1, \gamma = \sigma/\sqrt{2}$ . Returning to the second moment of  $\mathbf{u}$ , define the norm  $\|x\|_A \triangleq \sqrt{\langle x, Ax \rangle}$ , where  $A$  is the symmetric strictly positive definite matrix appearing in (17). Note that  $\lambda_{\min}(A)\|x\|^2 \leq \|x\|_A^2 \leq \lambda_{\max}(A)\|x\|^2$  for any  $x \in \mathbb{R}^d$ , where  $\lambda_{\min}(A) > 0$  is the smallest eigenvalue of  $A$  and  $\lambda_{\max}(A) < \infty$  is the largest eigenvalue of  $A$ . Applying Ito's lemma to the map  $\mathbf{u} \mapsto \|\mathbf{u}\|_A^2$ , we have for any  $\varepsilon > 0$  and  $0 \leq t \leq T < \infty$ ,

$$\begin{aligned} \mathbb{E}[\|\mathbf{u}_\varepsilon(t)\|_A^2] &= -2\gamma \int_0^t \mathbb{E} \left[ (2\mathbf{u}_\varepsilon(s)^\top A \mathbf{Z}_s + \mathbf{Z}_s^\top A \mathbf{Z}_s) (\mathbf{u}_\varepsilon(s)^\top A \mathbf{Z}_s) \right] ds + \|\mathbf{u}(0)\|_A^2 \\ &\leq -2\gamma \int_0^t \mathbb{E} \left[ (\mathbf{Z}_s^\top A \mathbf{Z}_s) (\mathbf{u}_\varepsilon(s)^\top A \mathbf{Z}_s) \right] ds + \|\mathbf{u}(0)\|_A^2 \\ &\leq 2\gamma \int_0^t \mathbb{E} \left[ \|\mathbf{u}_\varepsilon(s)\|_A \|\mathbf{Z}_s\|_A^3 \right] ds + \|\mathbf{u}(0)\|_A^2 \\ &\leq C \int_0^t \mathbb{E} \left[ \|\mathbf{u}_\varepsilon(s)\|_A^2 + \|\mathbf{Z}_s\|_A^6 \right] ds + \|\mathbf{u}(0)\|_A^2 \\ &\leq C \int_0^t \mathbb{E}[\|\mathbf{u}_\varepsilon(s)\|_A^2] ds + C(t + \varepsilon(1 - e^{-t/\varepsilon})) + \|\mathbf{u}(0)\|_A^2 \\ &\leq C(1 + \varepsilon + \|\mathbf{u}(0)\|_A^2) e^{Ct} < \infty \end{aligned}$$

where  $C$  is a constant independent of  $\varepsilon$  that changes from line to line. The second inequality follows using that  $-(\mathbf{u}_\varepsilon^\top A \mathbf{Z})^2 \leq 0$ , the third from Cauchy-Schwarz, and the fourth follows from Young's inequality. The fifth line follows from substituting and integrating the estimate for  $\mathbb{E}[\|\mathbf{Z}_t\|^p]$  computed above, and the final line follows from an application of Gronwall's inequality.

Since  $\mathbb{E}[\|\mathbf{u}_\varepsilon(t)\|^2] \leq (1/\lambda_{\min}(A)) \mathbb{E}[\|\mathbf{u}_\varepsilon(t)\|_A^2]$ , the coordinates of  $\mathbf{u}_\varepsilon(t)$  individually have bounded second moments for all  $\varepsilon > 0$ , and  $\sup_{\varepsilon \in (0,1]} \mathbb{E}[\pi_i^2(\mathbf{u}_\varepsilon(t))] \leq C(1 + \sup_{\varepsilon \in (0,1]} \varepsilon e^{Ct}) < \infty$  for all  $i$ . Hence,  $\mathbb{E}[\mathbf{u}_\varepsilon^i(t)] \rightarrow U^i(t)$  for each  $i$ , and so  $\mathbb{E}[\mathbf{u}_\varepsilon(t)] \rightarrow U(t)$  as  $\varepsilon \rightarrow 0$ .
